# Supplementary material for: Bulking up: the impact of polymer sterics on emulsion stability
Source: Royal Society of Chemistry journal article supplement (doi:10.1039/d4sm00772g), 2024-01-01
Supplement: d4sm00772g1.pdf [file d4sm00772g1.pdf]

*Supporting Information for*

**Bulking Up: The Impact of Polymer Sterics on Emulsion Stability**

Ashley N. Mapile, Lawrence F. Scatena\*

*Department of Chemistry and Biochemistry,  
University of Oregon, Eugene, OR 97403*

**Table of Contents**

|                                                |            |
|------------------------------------------------|------------|
| <b>VSFSS Schematic</b> .....                   | <b>2</b>   |
| Figure S1                                      |            |
| <b>Varying Molecular Weight C=O Data</b> ..... | <b>2-3</b> |
| Figure S2                                      |            |
| Figure S3                                      |            |
| <b>PMAA Characterization</b> .....             | <b>4</b>   |
| Figure S4                                      |            |
| Table S1                                       |            |
| Figure S5                                      |            |
| <b>Temperature-Dependent PDI</b> .....         | <b>5</b>   |
| Figure S6                                      |            |
| <b>Fitting Parameters</b> .....                | <b>6-9</b> |
| Table S2-S5                                    |            |

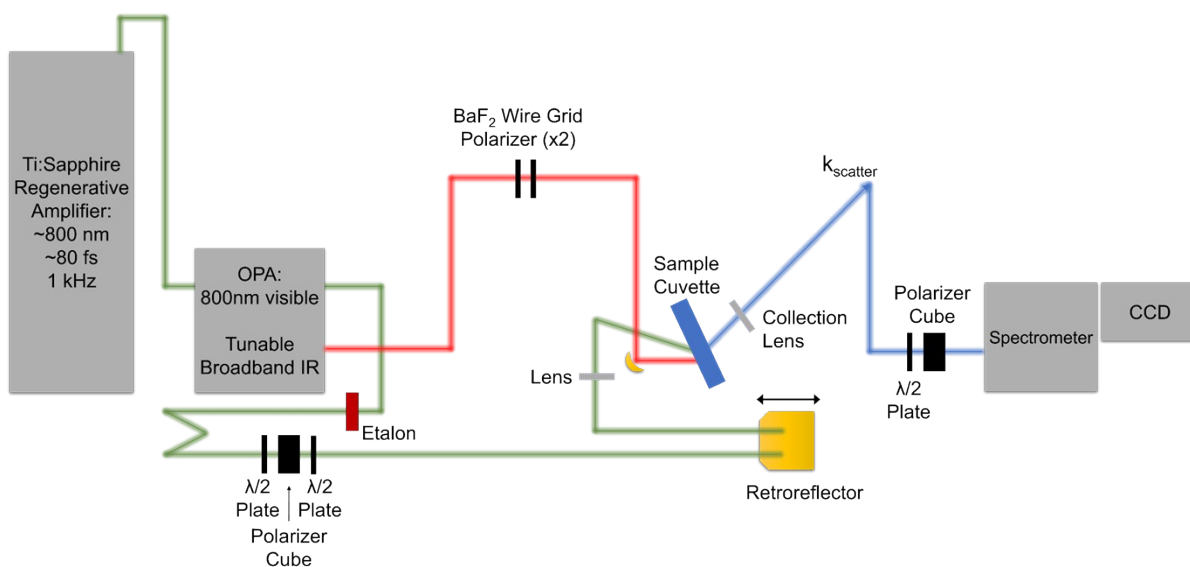

**Figure S1.** Schematic of the vibrational sum frequency scattering spectroscopy (VSFSS) experimental setup used in this work.

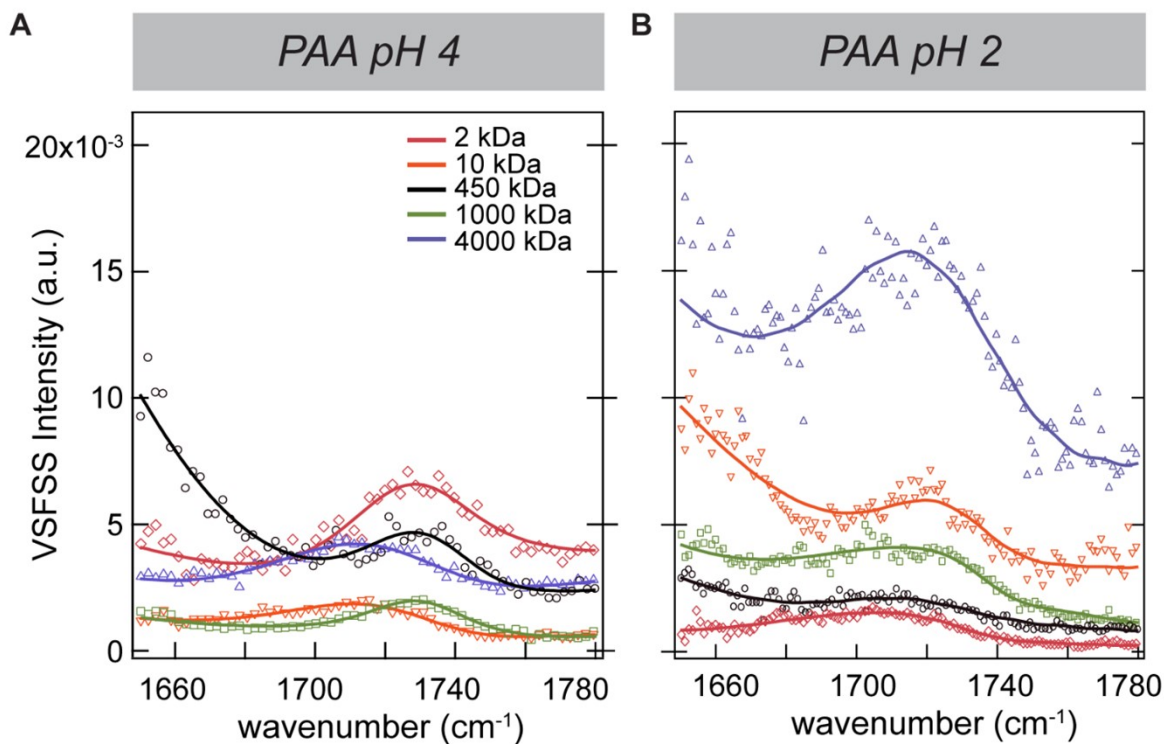

**Figure S2.** VSFSS measurements (*ssp* polarization) of D-hexadecane emulsions in  $D_2O$  stabilized with 500 ppm PAA of varying molecular weight at pH 4 (A) and pH 2 (B) in the C=O stretching region. Solid lines represent fits of the data.

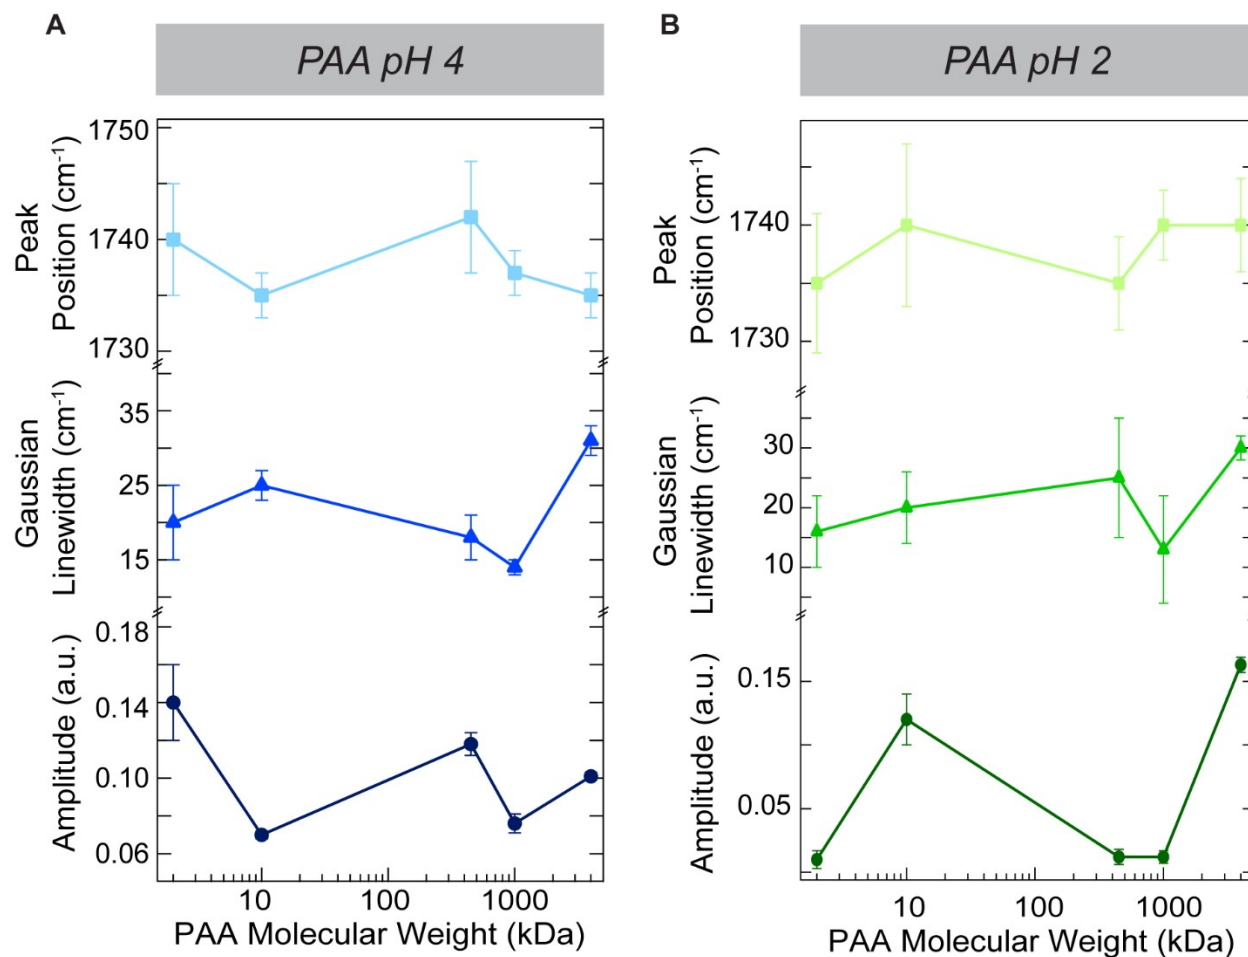

**Figure S3.** Fit parameter trends for VSFSS measurements of PAA of varying molecular weight at pH 4 (A) and pH 2 (B) in the C=O stretching region, corresponding to Figure 5.

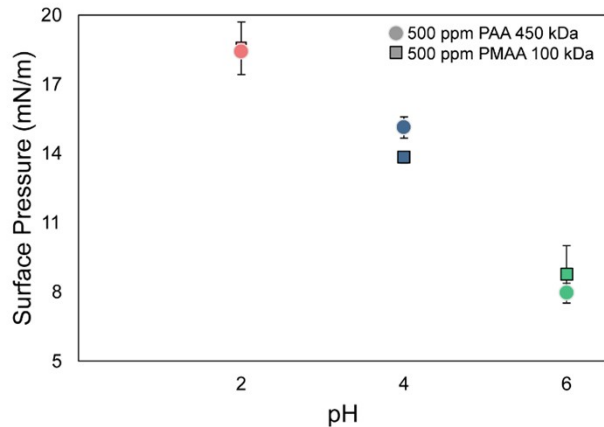

**Figure S4.** Equilibrium surface pressure of 500 ppm poly(acrylic acid) (circles) and 500 ppm poly(methacrylic acid) (squares) measured by pendant drop surface tensiometry at the hexadecane and water interface in varying pH conditions.

**Table S1.** Characteristics (diameter, polydispersity index, and zeta potential) of nanoemulsions formed with 500 ppm and 2687 ppm poly(methacrylic acid) (PMAA) at varying pH conditions.

| $[PMAA]$<br>(ppm) | pH | Diameter (nm) | Polydispersity Index | Zeta Potential (mV) |
|-------------------|----|---------------|----------------------|---------------------|
| 500               | 2  | 491.5         | 0.196                | -4.21               |
|                   | 4  | 505.9         | 0.265                | -8.47               |
|                   | 6  | 720.0         | 0.433                | -23.4               |
| 2687              | 2  | 383.0         | 0.200                | -1.71               |
|                   | 4  | 280.6         | 0.232                | -5.33               |
|                   | 6  | 572.8         | 0.674                | -44.0               |

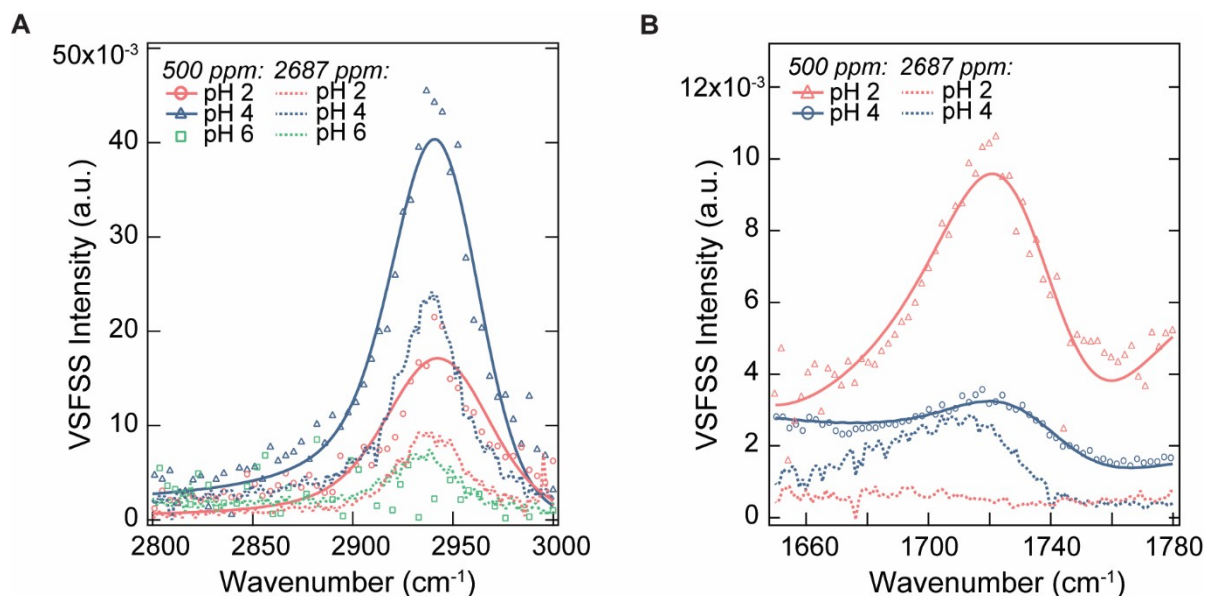

**Figure S5.** VSFSS measurements (ssp polarization) of D-hexadecane emulsions in D<sub>2</sub>O stabilized with PMAA in the (A) C-H and (B) C=O stretching regions in varying pH conditions. Lines represent fits of the data, corresponding to Figure 7 in the main text.

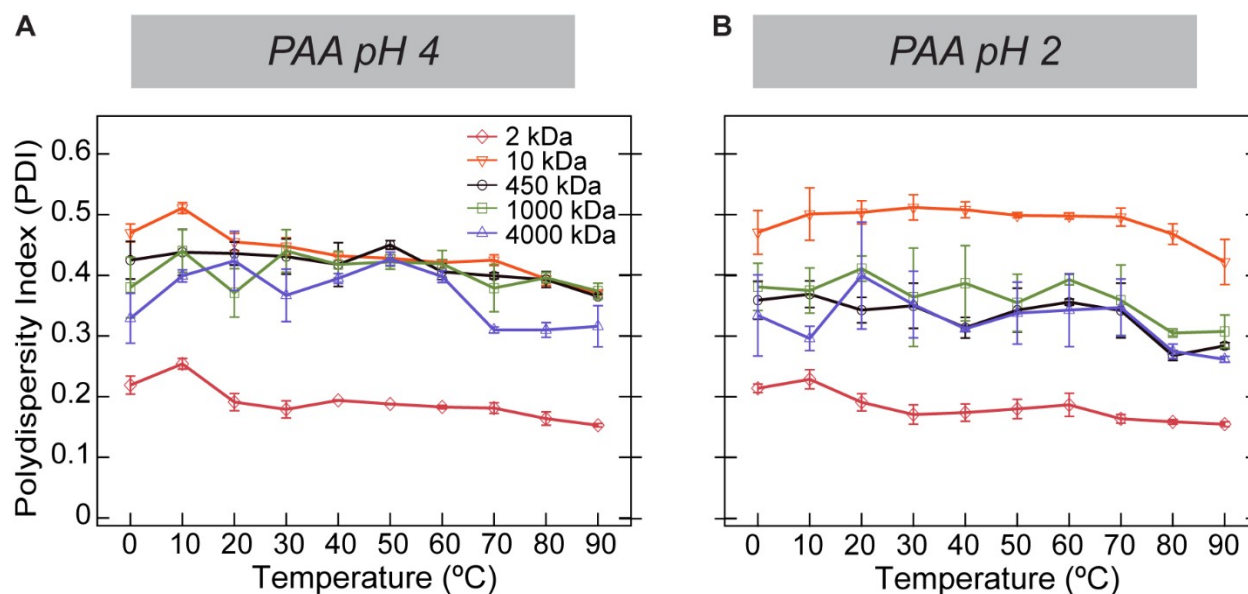

**Figure S6.** Polydispersity index (PDI) of nanoemulsions coated with 500 ppm PAA of varying molecular weight as a function of temperature at (A) pH 4 and (B) pH 2.

**Table S2.** Fitting parameters for C-H spectra of *d*-hexadecane emulsions in D<sub>2</sub>O coated with 500 ppm PAA with varying molecular weight, corresponding to Figure 2A and Figure 3A.

| Alkane C-H Stretches, <i>ssp</i> polarization |                      |               |                 |               |               |                 |
|-----------------------------------------------|----------------------|---------------|-----------------|---------------|---------------|-----------------|
| PAA, pH 4                                     |                      |               |                 |               |               |                 |
| Peak Assignment                               | Parameters           | 2 kDa         | 10 kDa          | 450 kDa       | 1000 kDa      | 4000 kDa        |
| Methine Stretch                               | Amplitude            | 0.045 ± 0.001 | 0.0486 ± 0.0009 | 0.074 ± 0.002 | 0.073 ± 0.001 | 0.0544 ± 0.0009 |
|                                               | Phase                | 0             | 0               | 0             | 0             | 0               |
|                                               | Lorentzian linewidth | 2             | 2               | 2             | 2             | 2               |
|                                               | Peak position        | 2868.2 ± 0.6  | 2873.3 ± 0.5    | 2871 ± 1      | 2865.3 ± 0.5  | 2870.7 ± 0.5    |
|                                               | Gaussian linewidth   | 62 ± 2        | 57.8 ± 0.8      | 42 ± 2        | 58.0 ± 0.8    | 60.0 ± 0.8      |
| Methylene Symmetric Stretch                   | Amplitude            | 0.101 ± 0.001 | 0.105 ± 0.001   | 0.190 ± 0.003 | 0.156 ± 0.002 | 0.117 ± 0.001   |
|                                               | Phase                | 0             | 0               | 0             | 0             | 0               |
|                                               | Lorentzian linewidth | 2             | 2               | 2             | 2             | 2               |
|                                               | Peak position        | 2931.1 ± 0.4  | 2930.9 ± 0.3    | 2931.5 ± 0.4  | 2928.0 ± 0.2  | 2930.6 ± 0.2    |
|                                               | Gaussian linewidth   | 15.8 ± 0.3    | 16.7 ± 0.2      | 17.1 ± 0.3    | 15.8 ± 0.2    | 15.7 ± 0.2      |
| Non-resonant                                  | Amplitude            | 0.003 ± 0.001 | 0.0031 ± 0.0007 | 0.010 ± 0.002 | 0.003 ± 0.001 | 0.0009 ± 0.0008 |
|                                               | Phase                | 0             | 0               | 0             | 0             | 0               |
| pH 2                                          |                      |               |                 |               |               |                 |
| Peak Assignment                               | Parameters           | 2 kDa         | 10 kDa          | 450 kDa       | 1000 kDa      | 4000 kDa        |
| Methine Stretch                               | Amplitude            | 0.049 ± 0.003 | 0.04 ± 0.02     | 0.073 ± 0.002 | 0.194 ± 0.004 | 0.139 ± 0.003   |
|                                               | Phase                | 0             | 0               | 0             | 0             | 0               |
|                                               | Lorentzian linewidth | 2             | 2               | 2             | 2             | 2               |
|                                               | Peak position        | 2871 ± 1      | 2871 ± 3        | 2872 ± 2      | 2872 ± 2      | 2871 ± 1        |
|                                               | Gaussian linewidth   | 134 ± 3       | 78 ± 5          | 60 ± 3        | 82 ± 4        | 111 ± 2         |
| Methylene Symmetric Stretch                   | Amplitude            | 0.171 ± 0.004 | 0.17 ± 0.01     | 0.181 ± 0.004 | 0.460 ± 0.006 | 0.285 ± 0.005   |
|                                               | Phase                | 0             | 0               | 0             | 0             | 0               |
|                                               | Lorentzian linewidth | 2             | 2               | 2             | 2             | 2               |
|                                               | Peak position        | 2932.7 ± 0.5  | 2933 ± 3        | 2932.0 ± 0.4  | 2929.3 ± 0.3  | 2931.9 ± 0.4    |
|                                               | Gaussian linewidth   | 14.3 ± 0.5    | 12 ± 1          | 15.4 ± 0.3    | 14.6 ± 0.2    | 14.9 ± 0.4      |
| Non-resonant                                  | Amplitude            | 0.003 ± 0.003 | 0.02 ± 0.01     | 0.012 ± 0.002 | 0.005 ± 0.004 | 0.004 ± 0.004   |
|                                               | Phase                | 0             | 0               | 0             | 0             | 0               |

**Table S3.** Fitting parameters for C=O spectra of *d*-hexadecane emulsions in D<sub>2</sub>O coated with 500 ppm PAA with varying molecular weight, corresponding to Figure 5.

| C=O Stretches, <i>ssp</i> polarization |                      |               |                 |               |               |               |
|----------------------------------------|----------------------|---------------|-----------------|---------------|---------------|---------------|
| PAA, pH 4                              |                      |               |                 |               |               |               |
| Peak Assignment                        | Parameters           | 2 kDa         | 10 kDa          | 450 kDa       | 1000 kDa      | 4000 kDa      |
| Background Peak 1                      | Amplitude            | 0.08 ± 0.01   | 0.046 ± 0.002   | 0.170 ± 0.007 | 0.17 ± 0.07   | 0.18 ± 0.08   |
|                                        | Phase                | 3.14          | 3.14            | 3.14          | 3.14          | 3.14          |
|                                        | Lorentzian linewidth | 10            | 10              | 10            | 10            | 10            |
|                                        | Peak position        | 1555 ± 42     | 1593 ± 7        | 1603 ± 6      | 1527 ± 16     | 1479 ± 34     |
|                                        | Gaussian linewidth   | 90 ± 43       | 31 ± 6          | 46 ± 7        | 32 ± 6        | 65 ± 7        |
| C=O Stretch                            | Amplitude            | 0.14 ± 0.02   | 0.070 ± 0.002   | 0.118 ± 0.006 | 0.076 ± 0.005 | 0.101 ± 0.002 |
|                                        | Phase                | 0             | 0               | 0             | 0             | 0             |
|                                        | Lorentzian linewidth | 5             | 5               | 5             | 5             | 5             |
|                                        | Peak position        | 1740 ± 5      | 1735 ± 2        | 1742 ± 5      | 1737 ± 2      | 1735 ± 2      |
|                                        | Gaussian linewidth   | 20 ± 5        | 25 ± 2          | 18 ± 3        | 14 ± 1        | 31 ± 2        |
| Background Peak 2                      | Amplitude            | 0.091 ± 0.005 | 0.0318 ± 0.0009 | 0.065 ± 0.008 | 0.12 ± 0.02   | 0.09 ± 0.01   |
|                                        | Phase                | 3.14          | 3.14            | 3.14          | 3.14          | 3.14          |
|                                        | Lorentzian linewidth | 10            | 10              | 10            | 10            | 10            |
|                                        | Peak Position        | 1862 ± 25     | 1956 ± 39       | 1830 ± 40     | 2134 ± 95     | 1935 ± 50     |
|                                        | Gaussian linewidth   | 113 ± 32      | 427 ± 67        | 88 ± 40       | 255 ± 64      | 179 ± 37      |
| Non-resonant                           | Amplitude            | 0.03 ± 0.01   | 0.019 ± 0.002   | 0.007 ± 0.006 | 0.05 ± 0.01   | 0.03 ± 0.02   |
|                                        | Phase                | 0             | 0               | 0             | 0             | 0             |

**Table S3.** Continued from previous page

| PAA, pH 2         |                      |               |             |               |               |               |
|-------------------|----------------------|---------------|-------------|---------------|---------------|---------------|
| Peak Assignment   | Parameters           | 2 kDa         | 10 kDa      | 450 kDa       | 1000 kDa      | 4000 kDa      |
| Background Peak 1 | Amplitude            | 0.028 ± 0.003 | 0.13 ± 0.01 | 0.029 ± 0.007 | 0.03 ± 0.01   | 0.19 ± 0.01   |
|                   | Phase                | 3.14          | 3.14        | 3.14          | 3.14          | 3.14          |
|                   | Lorentzian linewidth | 10            | 10          | 10            | 10            | 0             |
|                   | Peak position        | 1694 ± 10     | 1583 ± 14   | 1721 ± 6      | 1705 ± 10     | 1577 ± 11     |
|                   | Gaussian linewidth   | 50 ± 11       | 63 ± 17     | 44 ± 4        | 47 ± 17       | 25 ± 8        |
| C=O Stretch       | Amplitude            | 0.010 ± 0.007 | 0.12 ± 0.02 | 0.012 ± 0.006 | 0.012 ± 0.005 | 0.163 ± 0.006 |
|                   | Phase                | 0             | 0           | 0             | 0             | 0             |
|                   | Lorentzian linewidth | 5             | 5           | 5             | 5             | 5             |
|                   | Peak position        | 1735 ± 6      | 1740 ± 7    | 1735 ± 4      | 1740 ± 3      | 1740 ± 4      |
|                   | Gaussian linewidth   | 16 ± 6        | 20 ± 6      | 25 ± 10       | 13 ± 9        | 30 ± 2        |
| Background Peak 2 | Amplitude            | 0.7 ± 0.2     | 0.4 ± 0.1   | 1.04 ± 0.07   | 1.1 ± 0.6     | 0.67 ± 0.05   |
|                   | Phase                | 3.14          | 3.14        | 3.14          | 3.14          | 3.14          |
|                   | Lorentzian linewidth | 10            | 10          | 10            | 10            | 10            |
|                   | Peak Position        | 2539 ± 257    | 2205 ± 189  | 2506 ± 65     | 2539 ± 550    | 2305 ± 45     |
|                   | Gaussian linewidth   | 365 ± 117     | 270 ± 111   | 360 ± 31      | 378 ± 269     | 309 ± 28      |
| Non-resonant      | Amplitude            | 0.23 ± 0.06   | 0.12 ± 0.05 | 0.34 ± 0.02   | 0.4 ± 0.2     | 0.25 ± 0.02   |
|                   | Phase                | 0             | 0           | 0             | 0             | 0             |



**Table S4.** Fitting parameters for C-H spectra of *d*-hexadecane emulsions in D<sub>2</sub>O coated with 500 ppm PMAA, corresponding to Figure S5A.

| Alkane C-H Stretches, <i>ssp</i> polarization |                      |               |               |
|-----------------------------------------------|----------------------|---------------|---------------|
| PMAA, 500 ppm                                 |                      |               |               |
| Peak Assignment                               | Parameters           | pH 2          | pH 4          |
| Polymer Endcap Methyl Stretch                 | Amplitude            | 0.054 ± 0.002 | 0.067 ± 0.004 |
|                                               | Phase                | 0             | 0             |
|                                               | Lorentzian linewidth | 2             | 2             |
|                                               | Peak position        | 2887.0 ± 0.8  | 2890 ± 5      |
|                                               | Gaussian linewidth   | 121 ± 2       | 80 ± 8        |
| Methyl Symmetric Stretch                      | Amplitude            | 0.097 ± 0.003 | 0.172 ± 0.005 |
|                                               | Phase                | 0             | 0             |
|                                               | Lorentzian linewidth | 2             | 2             |
|                                               | Peak position        | 2939.8 ± 0.7  | 2937.1 ± 0.9  |
|                                               | Gaussian linewidth   | 22.1 ± 0.8    | 22.0 ± 0.6    |
| Non-resonant                                  | Amplitude            | 0.002 ± 0.002 | 0.003 ± 0.003 |
|                                               | Phase                | 0             | 0             |

**Table S5.** Fitting parameters for C=O spectra of *d*-hexadecane emulsions in D<sub>2</sub>O coated with 500 ppm PMAA, corresponding to Figure S5B.

| C=O stretches, <i>ssp</i> polarization |                      |               |                 |
|----------------------------------------|----------------------|---------------|-----------------|
| PMAA, 500 ppm                          |                      |               |                 |
| Peak Assignment                        | Parameters           | pH 2          | pH 4            |
| Background Peak                        | Amplitude            | 0.16 ± 0.01   | 0.047 ± 0.001   |
|                                        | Phase                | 0             | 0               |
|                                        | Lorentzian linewidth | 5             | 5               |
|                                        | Peak position        | 1536 ± 13     | 1470 ± 7        |
|                                        | Gaussian linewidth   | 87 ± 9        | 242 ± 8         |
| C=O Stretch                            | Amplitude            | 0.051 ± 0.002 | 0.0205 ± 0.0006 |
|                                        | Phase                | 0             | 0               |
|                                        | Lorentzian linewidth | 5             | 5               |
|                                        | Peak position        | 1735.6 ± 0.6  | 1736.4 ± 0.6    |
|                                        | Gaussian linewidth   | 22 ± 1        | 21 ± 1          |
| Non-resonant Contribution              | Amplitude            | 0.121 ± 0.004 | 0.0699 ± 0.0006 |
|                                        | Phase                | 0             | 0               |
